# Supplementary material for: Bilirubin oxidase bioelectrocatalytic cathodes: the impact of hydrogen peroxide
Source: Royal Society of Chemistry journal article supplement (doi:10.1039/c3cc47689h), 2013-10-29
Supplement: c3cc47689h.pdf [file c3cc47689h.pdf]

Electronic Supplementary Information

## Bilirubin oxidase bioelectrocatalytic cathodes: the impact of hydrogen peroxide

Cite this: DOI: 10.1039/x0xx00000x

Ross D. Milton, Fabien Giroud, Alfred E. Thumser, Shelley D. Minteer, and Robert C. T. Slade

Received 00th January 2012,  
Accepted 00th January 2012

DOI: 10.1039/x0xx00000x

www.rsc.org/

### Supplementary Figures

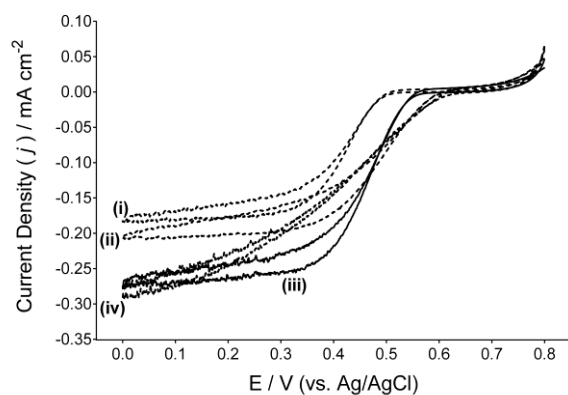

**Fig. S1** Cyclic voltammograms of BOD/Ac-MWCNTs Toray-paper electrodes in air-purged hydrodynamic solutions of aqueous citrate/phosphate buffer (0.2 M) at pH 4.5 (iv), 5.5 (ii), 6.5 (iii) and 7.5 (i). The scan rate was 1 mV s<sup>-1</sup>.

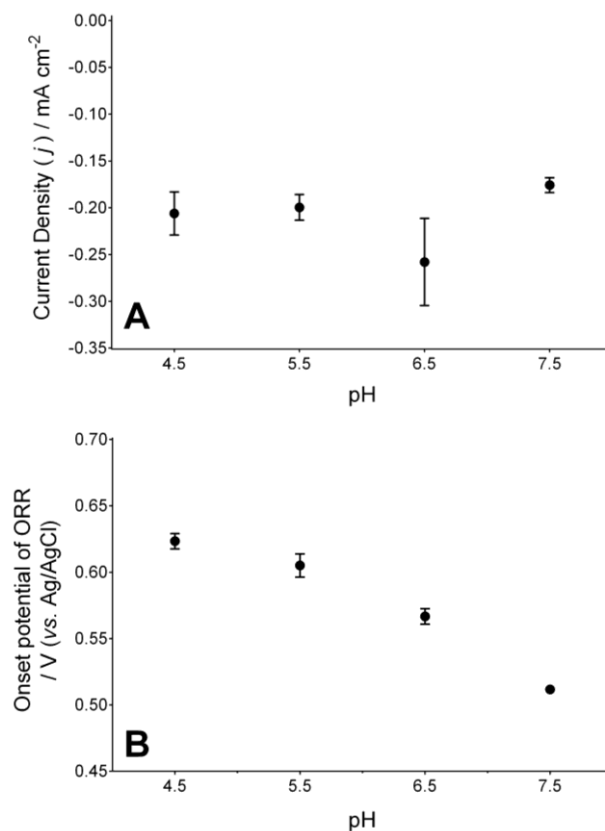

**Fig. S2** (A) Catalytic current densities extracted from Fig. S1 at over-potentials of 0.35 V from the onset-potentials of O<sub>2</sub> reduction for each replicate (*n* = 3, error = SD). (B) Onset-potentials for O<sub>2</sub> reduction extracted from Fig. S1 (*n* = 3, error = SD).

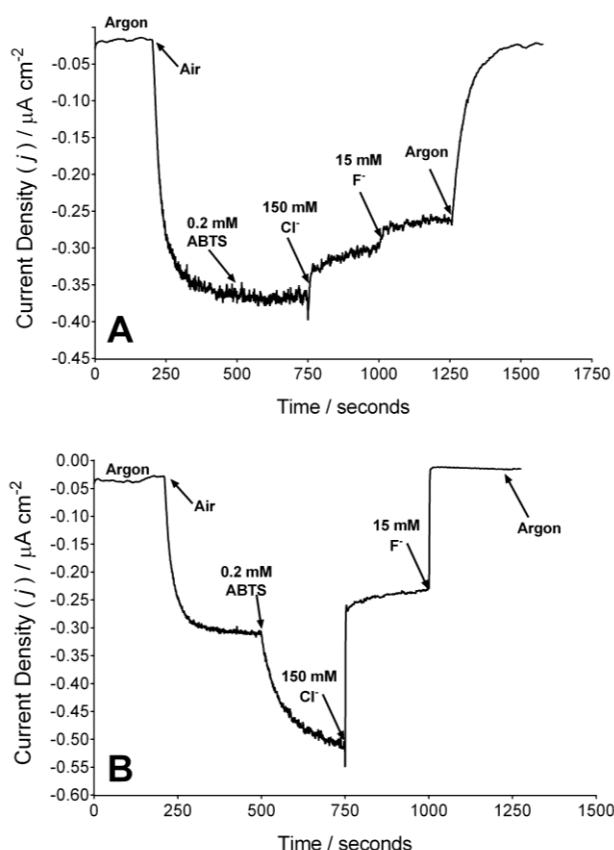

**Fig. S3** Chronoamperometric trace for a (A) BOD/Ac-MWCNTs Toray-paper electrode (pH 6.5) and a (B) laccase/Ac-MWCNTs Toray-paper electrode (pH 4.5) in a hydrodynamic aqueous citrate/phosphate buffer solution (0.2 M) poised at 0.2 V (vs. Ag/AgCl).

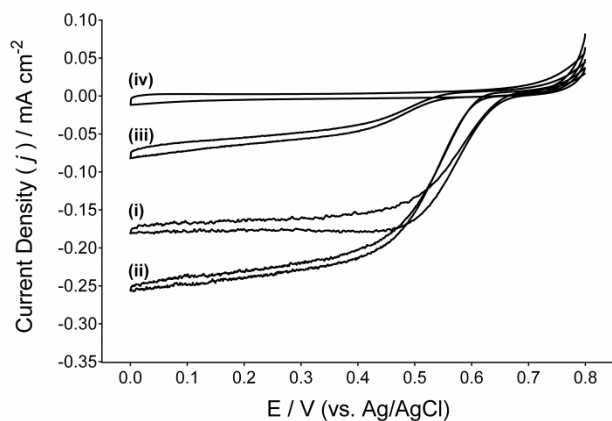

**Fig. S4** Average cyclic voltammograms of laccase/Ac-MWCNTs Toray-paper electrodes in air-purged hydrodynamic solutions of aqueous citrate/phosphate buffer (0.2 M) at pH 4.5 (i), 5.5 (ii), 6.5 (iii) and 7.5 (iv). The scan rate was  $1 \text{ mV s}^{-1}$ .

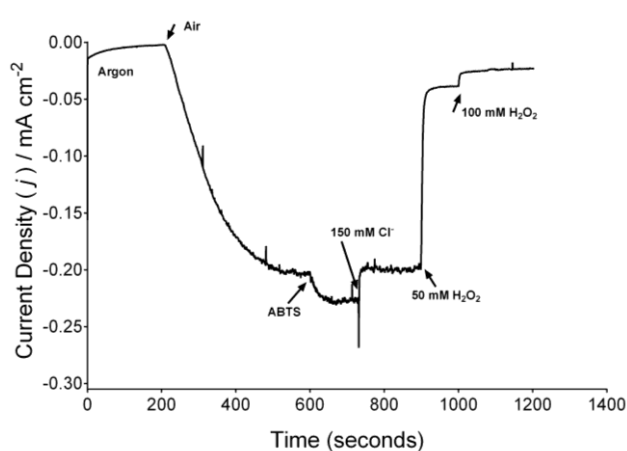

**Fig. S5** Chronoamperometric trace for a laccase/Ac-MWCNTs Toray-paper electrode in a hydrodynamic aqueous citrate/phosphate buffer solution (0.2 M, pH 4.5) poised at 0.2 V (vs. Ag/AgCl).

## Experimental Procedures

### Chemicals

Bilirubin oxidase (BOD, *Myrothecium sp.*,  $\geq 1.2 \text{ U mg}^{-1}$ , EC: 1.3.3.5) was kindly donated by Sekisui Diagnostics (UK) and used as received. Laccase (*Trametes versicolor*,  $\geq 10 \text{ U mg}^{-1}$ , EC: 1.10.3.2), catalase (bovine liver, 2000-5000  $\text{U mg}^{-1}$ , EC: 1.11.1.6), albumin from bovine serum (BSA), citric acid, sodium citrate, sodium chloride, sodium fluoride, paraffin wax, 2,2'-azinobis(3-ethylbenzothiazoline-6-sulfonic acid) (ABTS), hydrogen peroxide and tetrabutylammonium bromide (TBAB) were purchased from Sigma-Aldrich, and used as received. Water used was taken from a Millipore Type 1 (Ultrapure) Milli-Q system ( $18.2 \text{ M}\Omega \text{ cm}$ ). Anthracene-modified MWCNTs (Ac-MWCNTs) prepared from OH-modified MWCNTs (purchased from www.cheaptubes.com), and TBAB-modified Nafion® were prepared as previously reported.<sup>1</sup> Toray carbon paper (TGP-H-060, non-wet-proofed) was purchased from Alfa Aesar (UK), and used as received.

### Instrumentation

Electrochemical analyses were conducted using an AutoLab PGSTAT302N instrument (EcoChemie, Netherlands). Pt-wire and Pt-mesh electrodes were used as counter-electrodes in three-electrode electrochemical tests. Ag/AgCl (3 M KCl) reference electrodes were used. Toray paper electrodes were cut and wax-coated to give an untreated surface area of  $1 \text{ cm}^2$ . Cyclic voltammetry and chronoamperometry were used to analyse the performance of the enzymatic cathodes. Analysis was performed at room temperature ( $22 \pm 1^\circ\text{C}$ ). Citrate buffer (pH 4.5/6.5, 0.2 M) was used as the background electrolyte. Current densities are reported as a function of geometric

electrode area. Enzymatic activity assays were performed using a Biochrom Instruments Libra S60 double-beam UV-Visible Spectrophotometer.

### Bilirubin Oxidase/Laccase Cathode Fabrication

A stock solution of tetrabutylammonium bromide-modified Nafion® (TBAB-Nafion®) in ethanol and anthracene-modified MWCNTs (Ac-MWCNTS) were prepared as previously reported.<sup>1</sup> Water used was taken from a Millipore Type 1 (Ultrapure) Milli-Q system.

1.5 mg of crude enzyme was added to 75 µL of citrate/phosphate buffer (0.2 M, at the pH to be investigated) and gently mixed until dissolved. This solution was then added to 7.5 mg of Ac-MWCNTs and mixed by a combination of vortex-mixing and gentle sonication for a total of 4 minutes and 1 minute, respectively. TBAB-Nafion® in ethanol (25 µL) was then added to the mixture, followed by vortex-mixed for a further minute. This mixture was then evenly painted onto Toray paper electrodes (geometric surface area of 1 cm<sup>2</sup>) with approximately 30 µL being deposited on each electrode. The electrodes were then gently dried under a positive air-flow and stored at 4°C until use.

### Bilirubin Oxidase/Laccase Activity Assays

The specific enzymatic activity of bilirubin oxidase and crude laccase was calculated using 2,2'-azinobis(3-ethylbenzothiazoline-6-sulfonic acid) (ABTS) as the substrate, at room temperature and at either pH 6.5 (BOd) or 4.5 (laccase). Spectrophotometric analysis was performed on a Biochrom Instruments Libra S60 double-beam UV-Visible Spectrophotometer. Water used was taken from a Millipore Type 1 (Ultrapure) Milli-Q system.

Stock solutions of ABTS (0.54 mM in water) and enzyme (0.1 mg/mL in water) were prepared, prior to use. 1.36 mL of citrate/phosphate buffer (50 mM), 12.5 µL of the enzyme solution and 0.125 mL of the ABTS solution were added to a cuvette. The solutions were mixed by inversion of the cuvette and the absorbance was recorded at a wavelength of 420 nm for 3 minutes. Control experiments consisted of substituting the 125 µL enzyme fraction with 12.5 µL of water.

For activity assays incorporating catalase (with an incubation time of 5 minutes), 0.125 mL of catalase (0.2 mg/mL in 50 mM citrate/phosphate buffer) replaced 0.125 mL of buffer, and was added at either  $t = 0$  or  $t = 5$  minutes (to allow compensation for the concomitant increase in dissolved O<sub>2</sub> concentration due to H<sub>2</sub>O<sub>2</sub> decomposition by catalase).

### Acknowledgements

The AutoLab PGSTAT302N is funded by EPSRC contract EP/I004882/1 (EPSRC Leadership Fellow Grant – Professor J. Varcoe). The authors thank Sekisui Diagnostics (UK) for their kind donation of FAD-dependent glucose dehydrogenase (FAD-GDH) and bilirubin oxidase (BOd) (*Myrothecium sp.*).

### References

1. M. T. Meredith, M. Minson, D. Hickey, K. Artyushkova, D. T. Glatzhofer and S. D. Minteer, *ACS Catal.*, 2011, **1**, 1683-1690.
